# Supplementary material for: A new honeycomb MOF for C2H4purification and C3H6enrichment by separating methanol to olefin products
Source: Royal Society of Chemistry journal article supplement (doi:10.1039/d2ta08977g), 2022-12-28
Supplement: d2ta08977g1.pdf [file d2ta08977g1.pdf]

## *Supporting Information*

### **New honeycomb MOF for C<sub>2</sub>H<sub>4</sub> purification and C<sub>3</sub>H<sub>6</sub> enrichment by separating methanol to olefin products**

Lin Zhang,<sup>a</sup> Li-Na Ma,<sup>a</sup> Gang-Ding Wang,<sup>a</sup> Lei Hou,<sup>\*,a</sup> Zhonghua Zhu<sup>b</sup> and Yao-Yu Wang<sup>\*,a</sup>

*<sup>a</sup>Key Laboratory of Synthetic and Natural Functional Molecule of the Ministry of Education, Xi'an Key Laboratory of Functional Supramolecular Structure and Materials, College of Chemistry & Materials Science, Northwest University, Xi'an, 710069, P. R. China.*

*<sup>b</sup>School of Chemical Engineering, The University of Queensland Brisbane 4072, Australia.*

*\*To whom correspondence should be addressed. E-mail: lhou2009@nwu.edu.cn (Lei Hou);*

*wyaoyu@nwu.edu.cn (Yao-Yu Wang).*

## X-ray crystallographic measurements

The single crystal diffraction data was conducted at 296(2) K on a Bruker SMART APEX II CCD detector diffractometer. The structure was solved by direct method and refined on  $F^2$  by full-matrix least-squares procedures with SHELXL-2014 software package. The non-hydrogen atoms were refined anisotropically, while the hydrogen atoms added to their geometrically ideal positions and were refined isotropically. For the disordered lattice molecules that cannot be well refined, the SQUEEZE procedure was adopted in structural refinement. The results of structure refinement and selected bond distances/angles are listed in Tables S1 and S2, respectively.

## Calculation of sorption heat using Virial 2 model

$$\ln P = \ln N + 1/T \sum_{i=0}^m a_i N^i + \sum_{i=0}^n b_i N^i \quad Q_{st} = -R \sum_{i=0}^m a_i N^i$$

The above virial expression was used to fit the combined isotherm data (measured at 273 and 298 K) for Mn-dtzip, where  $P$  is the pressure,  $N$  is the adsorbed amount,  $T$  is the temperature,  $a_i$  and  $b_i$  are virial coefficients, and  $m$  and  $N$  are the number of coefficients used to describe the isotherms.  $Q_{st}$  is the coverage-dependent enthalpy of adsorption and  $R$  is the universal gas constant.

## IAST adsorption selectivity calculation

The experimental isotherm data for pure  $C_2H_4$  and  $C_3H_6$  (measured at 273 and 298 K) was fitted using a double-site Langmuir-Freundlich (DSLFF) model:

$$N = A_1 \frac{b_1 P^{c_1}}{1 + b_1 P^{c_1}} + A_2 \frac{b_2 P^{c_2}}{1 + b_2 P^{c_2}}$$

Where  $A$  and  $p$  are the adsorbed amounts and the pressure of component  $i$ , respectively.

The adsorption selectivity for binary mixtures defined by

$$S_{ij} = \frac{x_i^* y_j}{x_j / y_i}$$

was calculated using the Ideal Adsorption Solution Theory (IAST) of Myers and Prausnitz. Where  $x_i$  is the mole fraction of component  $i$  in the adsorbed phase and  $y_i$  is the mole fraction of component  $i$  in the bulk.

### The separation potential ( $\Delta q$ )

For screening MOFs for separation of binary mixtures of components 1 and 2, the adsorption selectivity,  $S_{ads}$ , is defined by

$$S_{ads} = \frac{q_1/q_2}{y_{10}/y_{20}}$$

In eq,  $y_{10}$  and  $y_{20}$  are the mole fractions of the bulk gas phase mixture. The  $C_3H_6(1)/C_2H_4(2)$  mixture separations are envisaged to be carried out in fixed bed adsorbents. In such devices, the separations are dictated by a combination of adsorption selectivity and uptake capacity. Using the shock wave model for fixed bed adsorbents, Krishna<sup>1, 2</sup> has suggested that the appropriate metric is the separation potential,  $\Delta q_1$ . The appropriate expression describing the productivity of pure  $C_3H_6$  in the desorption phase of fixed-bed operations is

$$\Delta q_1 = q_1 - q_2 \frac{y_{10}}{y_{20}}$$

In eq,  $y_{10}$  and  $y_{20}$  are the mole fractions of the feed mixture during the adsorption cycle. In the derivation of eq, it is assumed that the concentration “fronts” traversed the column in the form of shock waves during the desorption cycle. The molar loadings  $q_1$  and  $q_2$  of the two components are determined using the Ideal Adsorbed Solution Theory (IAST) of Myers and

Prausnitz using the unary isotherm fits as data inputs.<sup>3</sup> The physical significance of  $\Delta q_1$  is the maximum productivity of pure  $C_3H_6(1)$  that is achievable in PSA operations.

### **GCMC simulation**

Grand canonical Monte Carlo (GCMC) simulations were performed for the gas adsorption in the framework by the Sorption module of Material Studio (Accelrys. Materials Studio Getting Started). The partial charges for atoms of the framework were derived from QEq method and QEq neutral 1.0 parameter. One unit cell was used during the simulations. The interaction energies between the gas molecules and framework were computed through the Coulomb and Lennard-Jones 6-12 (LJ) potentials. All parameters for the atoms were modeled with the universal force field (UFF) embedded in the MS modeling package. A cutoff distance of 12.5 Å was used for LJ interactions, and the Coulombic interactions were calculated by using Ewald summation. For each run, the  $3 \times 10^6$  maximum loading steps,  $3 \times 10^6$  production steps were employed.

### **Breakthrough Experiments**

The breakthrough experiment was performed on the Quantachrome dynaSorb BT equipments at 298/273 K and 1 atm (Ar as the carrier gas). The activated Mn-dtzip (1.012 g) was filled into a packed column of  $4.2 \times 80$  mm, and then the packed column was washed with Ar at a rate of 7 mL min<sup>-1</sup> at 343 K for 60 minutes to further activate the samples. Between two breakthrough experiments, the adsorbent was regenerated by Ar flow of 7 mL min<sup>-1</sup> for 35 min at 353 K to guarantee a complete removal of the adsorbed gases.

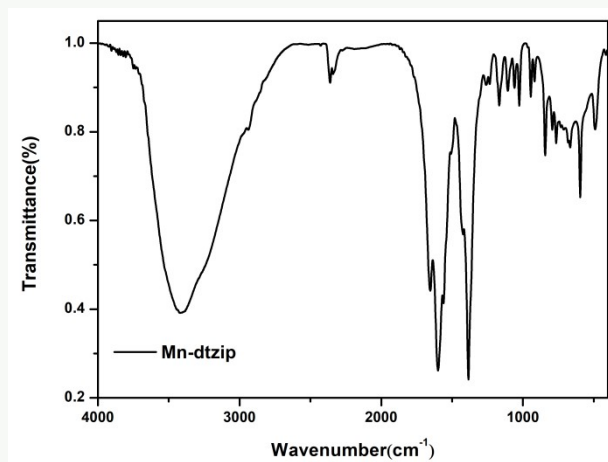

**Fig. S1.** FTIR spectra of Mn-dtzip.

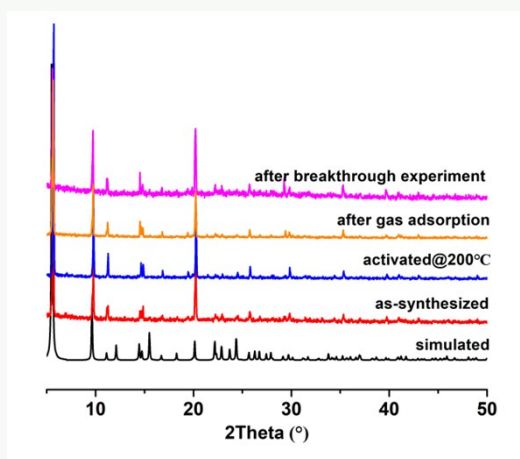

**Fig. S2.** PXRD patterns of Mn-dtzip after different treatments.

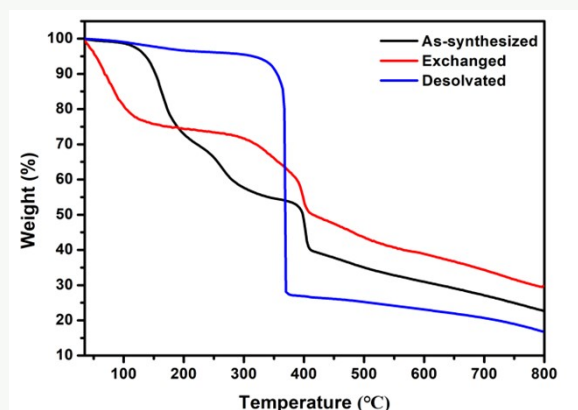

**Fig. S3.** TGA curves for Mn-dtzip.

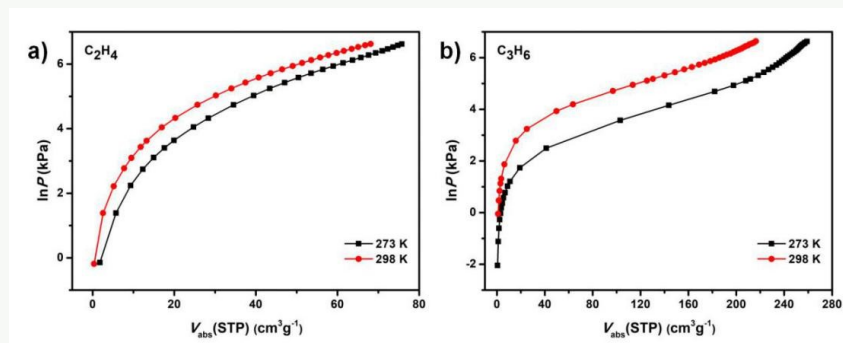

**Fig. S4.** Adsorption isotherms of Mn-dtzip fitted by Virial 2 model (the fitted parameters were listed in Table S3).

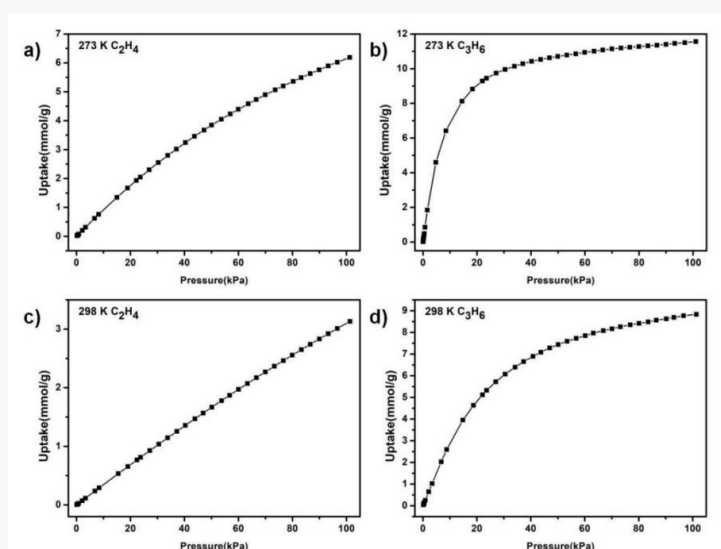

**Fig. S5.** Gas adsorption isotherms fitting by DSLF model at 273/298 K (the fitted parameters were listed in Table S4).

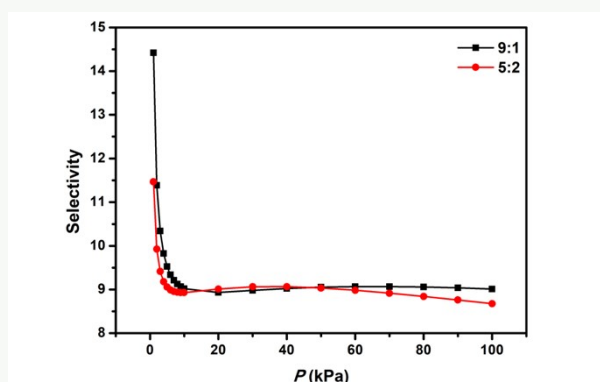

**Fig. S6.** IAST selectivities for different  $C_2H_4$ - $C_3H_6$  mixtures at 298 K.

**Table S1.** The details about solvents and chemicals.

| Chemicals                            | Purities | Brands   |
|--------------------------------------|----------|----------|
| MnCl <sub>2</sub> ·4H <sub>2</sub> O | 99.0%    | aladdin  |
| DMF                                  | 99.5%    | Greagent |
| HNO <sub>3</sub>                     | 65%      | Greagent |
| H <sub>2</sub> dtzip                 | 98.0%    | Adamas   |

**Table S2.** Crystallographic data of Mn-dtzip.

|                                                                                           |                                                               |
|-------------------------------------------------------------------------------------------|---------------------------------------------------------------|
| Empirical formula                                                                         | C <sub>8</sub> H <sub>8</sub> MnN <sub>5</sub> O <sub>3</sub> |
| Formula weight                                                                            | 157(2)                                                        |
| Crystal system                                                                            | Hexagonal                                                     |
| Space group                                                                               | <i>P</i> 6 <sub>4</sub>                                       |
| <i>a</i> (Å)                                                                              | 18.3490(3)                                                    |
| <i>b</i> (Å)                                                                              | 18.3490(3)                                                    |
| <i>c</i> (Å)                                                                              | 8.2189(2)                                                     |
| <i>α</i> , <i>β</i> , <i>γ</i> (°)                                                        | 90, 90, 120                                                   |
| <i>Z</i> , <i>V</i> (Å <sup>3</sup> )                                                     | 6, 2396.45(10)                                                |
| <i>D</i> <sub>c</sub> (g cm <sup>-3</sup> ), <i>μ</i> (mm <sup>-1</sup> )                 | 1.152, 0.829                                                  |
| Reflns collected/unique/                                                                  | 32741 / 2939                                                  |
| <i>R</i> <sub>int</sub> , GOF                                                             | 0.0628, 1.182                                                 |
| <i>R</i> <sub>1</sub> <sup>a</sup> , <i>wR</i> <sub>2</sub> <sup>b</sup> [ <i>I</i> > 2σ] | 0.0308, 0.0755                                                |

<sup>a</sup>*R*<sub>1</sub> = Σ||*F*<sub>o</sub>| - |*F*<sub>c</sub>||/Σ|*F*<sub>o</sub>|; <sup>b</sup>*wR*<sub>2</sub> = [Σ*w*(*F*<sub>o</sub><sup>2</sup> - *F*<sub>c</sub><sup>2</sup>)/Σ*w*(*F*<sub>o</sub><sup>2</sup>)]<sup>1/2</sup>.

**Table S3.** Selected bond lengths (Å) and bond angles (°) for Mn-dtzip.

|                   |            |                     |            |
|-------------------|------------|---------------------|------------|
| Mn(1)-O(3)        | 2.139(3)   | O(3)-Mn(1)-N(3)#2   | 97.77(13)  |
| Mn(1)-O(1)        | 2.210(3)   | O(1)-Mn(1)-N(3)#2   | 81.43(11)  |
| Mn(1)-O(1)#1      | 2.214(3)   | O(1)#1-Mn(1)-N(3)#2 | 106.37(12) |
| Mn(1)-N(3)#2      | 2.216(3)   | O(3)-Mn(1)-N(1)     | 90.11(12)  |
| Mn(1)-N(1)        | 2.217(3)   | O(1)-Mn(1)-N(1)     | 80.68(10)  |
| Mn(1)-N(2)#3      | 2.458(3)   | O(1)#1-Mn(1)-N(1)   | 85.21(10)  |
| O(1)-Mn(1)#3      | 2.214(3)   | N(3)#2-Mn(1)-N(1)   | 160.26(12) |
| N(2)-Mn(1)#1      | 2.458(3)   | O(3)-Mn(1)-N(2)#3   | 163.37(11) |
| N(3)-Mn(1)#5      | 2.216(3)   | O(1)-Mn(1)-N(2)#3   | 76.37(10)  |
| O(3)-Mn(1)-O(1)   | 88.68(11)  | O(1)#1-Mn(1)-N(2)#3 | 74.24(10)  |
| O(3)-Mn(1)-O(1)#1 | 118.85(11) | N(3)#2-Mn(1)-N(2)#3 | 87.30(11)  |
| O(1)-Mn(1)-O(1)#1 | 149.09(9)  | N(1)-Mn(1)-N(2)#3   | 80.43(11)  |

Symmetry transformations used to generate equivalent atoms: #1 -x+y+1, -x+1, z-1/3; #2 -x+y+1, -x+1, z+2/3; #3 -y+1, x-y, z+1/3; #4 -x+1, -y+1, z; #5 -y+1, x-y, z-2/3.

**Table S4.** Fitting parameters of the adsorption heats for Mn-dtzip.

|                  | C <sub>2</sub> H <sub>4</sub> | C <sub>3</sub> H <sub>6</sub> |
|------------------|-------------------------------|-------------------------------|
| a0               | -2949.18889                   | -4200.78352                   |
| a1               | -0.69307                      | -1.52258                      |
| a2               | 0.02317                       | 0.02901                       |
| a3               | -1.38843E-4                   | -1.52035E-4                   |
| a4               | 3.4771E-7                     | 3.77587E-7                    |
| b0               | 12.11093                      | 14.20636                      |
| R <sup>2</sup>   | 0.99976                       | 0.99954                       |
| Chi <sup>2</sup> | 8.471E-4                      | 0.0027                        |



**Table S5.** Fitting parameters of IAST selectivity for Mn-dtzip at 273/298 K.

|                  | 273 K C <sub>2</sub> H <sub>4</sub> | 273 K C <sub>3</sub> H <sub>6</sub> | 298 K C <sub>2</sub> H <sub>4</sub> | 298 K C <sub>3</sub> H <sub>6</sub> |
|------------------|-------------------------------------|-------------------------------------|-------------------------------------|-------------------------------------|
| A1               | 16.3799                             | 41.88179                            | 17.3019                             | 4.78853                             |
| b1               | 0.00566                             | 0.00182                             | 0.00182                             | 0.01395                             |
| c1               | 1.03366                             | 0.5201                              | 1.0397                              | 0.48139                             |
| A2               | 1.19966                             | 11.15715                            | 0.00562                             | 9.54685                             |
| b2               | -0.00231                            | 0.10506                             | 994.79499                           | 0.02404                             |
| c2               | 1.0069                              | 1.16804                             | 77.02079                            | 1.21342                             |
| R <sup>2</sup>   | 1                                   | 0.99997                             | 1                                   | 0.99999                             |
| Chi <sup>2</sup> | 1.73466E-5                          | 6.6698E-4                           | 3.93865E-6                          | 1.1006E-4                           |

**Table S6.** IAST selectivity of C<sub>3</sub>H<sub>6</sub>/C<sub>2</sub>H<sub>4</sub> at 1 atm and 298 K for the equimolar binary C<sub>3</sub>H<sub>6</sub>-C<sub>2</sub>H<sub>4</sub> mixtures in different Materials.

| Materials                   | C <sub>3</sub> H <sub>6</sub> Uptake<br>(cm <sup>3</sup> g <sup>-1</sup> ) | C <sub>2</sub> H <sub>4</sub> Uptake<br>(cm <sup>3</sup> g <sup>-1</sup> ) | Selectivity |
|-----------------------------|----------------------------------------------------------------------------|----------------------------------------------------------------------------|-------------|
| ANPC-2-700 <sup>[1]</sup>   | 203.4                                                                      | 105.1                                                                      | 9.81        |
| <b>Mn-dtzip (This work)</b> | <b>216.4</b>                                                               | <b>76.7</b>                                                                | <b>8.6</b>  |
| NEM-7-Cu <sup>[2]</sup>     | 75.5                                                                       | 29                                                                         | 8.6         |
| MFM-202a <sup>[3]</sup>     | 160.8                                                                      | 64.96                                                                      | 8.4         |
| srI-MOF <sup>[4]</sup>      | 30.1                                                                       | 21.4                                                                       | 8.09        |
| iso-MOF-4 <sup>[5]</sup>    | 254.5                                                                      | 73.1                                                                       | 7.74        |
| spe-MOF <sup>[4]</sup>      | 236.9                                                                      | 48.9                                                                       | 7.7         |
| iso-MOF-3 <sup>[5]</sup>    | 234.7                                                                      | 66                                                                         | 7.04        |
| NEM-4 <sup>[2]</sup>        | 197.4                                                                      | 164.1                                                                      | 6.8         |
| iso-MOF-2 <sup>[5]</sup>    | 254.1                                                                      | 71.4                                                                       | 6.6         |
| LIFM-38 <sup>[6]</sup>      | 58                                                                         | 20                                                                         | 6.4         |
| HKUST-1 <sup>[7]</sup>      | 137.4                                                                      | 102.14                                                                     | 5.8         |
| UPC-33 <sup>[8]</sup>       | 94.3                                                                       | 31.1                                                                       | 5.7         |

|                                                                                             |        |        |     |
|---------------------------------------------------------------------------------------------|--------|--------|-----|
| Yb-pek-MOF <sup>[9]</sup>                                                                   | 127.3  | 41.7   | 5.4 |
| iso-MOF-1 <sup>[5]</sup>                                                                    | 209    | 51     | 5.1 |
| (Cr)-MIL-101-SO <sub>3</sub> Ag <sup>[10]</sup>                                             | 105.84 | 63.95  | 4.8 |
| Mg-MOF-74 <sup>[11]</sup>                                                                   | 149.98 | 161.28 | 4.7 |
| PCP-1 <sup>[12]</sup>                                                                       | 70.672 | 56.67  | 3.6 |
| [Cd <sub>2</sub> (AzDC) <sub>2</sub> (TPT) <sub>2</sub> ](DMF) <sub>3</sub> <sup>[13]</sup> | 59.84  | 44.95  | 1.2 |

**Table S7.** Breakthrough experiment of Mn-dtzip at different test conditions.

| <b>273 K</b>                                                     |                         |                               |                               |                        |                                    |                                    |                                           |
|------------------------------------------------------------------|-------------------------|-------------------------------|-------------------------------|------------------------|------------------------------------|------------------------------------|-------------------------------------------|
| C <sub>2</sub> H <sub>4</sub> /C <sub>3</sub> H <sub>6</sub> /Ar | Flow rate               | C <sub>2</sub> H <sub>4</sub> | C <sub>3</sub> H <sub>6</sub> | $\Delta t$             | C <sub>2</sub> H <sub>4</sub>      | C <sub>3</sub> H <sub>6</sub>      | C <sub>3</sub> H <sub>6</sub> , recovered |
| (v/v/v)                                                          | (mL min <sup>-1</sup> ) | Retention time                | Retention time                | (min g <sup>-1</sup> ) | Collection volume                  | Collection volume                  | from the bed                              |
|                                                                  |                         | (min g <sup>-1</sup> )        | (min g <sup>-1</sup> )        |                        | (cm <sup>3</sup> g <sup>-1</sup> ) | (cm <sup>3</sup> g <sup>-1</sup> ) | (%)                                       |
| 5/5/90                                                           | 5                       | 26.4                          | 116.6                         | 90.2                   | 25.9                               | 29.0                               | 90.0                                      |
| 5/2/93                                                           | 5                       | 26.3                          | 196.0                         | 169.7                  | 44.0                               | 19.6                               | 79.9                                      |
| 9/1/90                                                           | 5                       | 23.3                          | 236.7                         | 213.4                  | 98.2                               | 11.6                               | 58.4                                      |
| 20/20/60                                                         | 8                       | 8.9                           | 21.1                          | 12.2                   | 30.6                               | 33.5                               | 91.0                                      |
| 25/10/65                                                         | 7                       | 9.9                           | 40.6                          | 30.7                   | 65.8                               | 28.1                               | 84.2                                      |
| 36/4/60                                                          | 8                       | 9.1                           | 62.2                          | 53.1                   | 164.4                              | 19.6                               | 57.0                                      |
| <b>298 K</b>                                                     |                         |                               |                               |                        |                                    |                                    |                                           |
| C <sub>2</sub> H <sub>4</sub> /C <sub>3</sub> H <sub>6</sub> /Ar | Flow rate               | C <sub>2</sub> H <sub>4</sub> | C <sub>3</sub> H <sub>6</sub> | $\Delta t$             | C <sub>2</sub> H <sub>4</sub>      | C <sub>3</sub> H <sub>6</sub>      | C <sub>3</sub> H <sub>6</sub> recovered   |
| (v/v/v)                                                          | (mL min <sup>-1</sup> ) | Retention time                | Retention time                | (min g <sup>-1</sup> ) | Collection volume                  | Collection volume                  | from the bed                              |
|                                                                  |                         | (min g <sup>-1</sup> )        | (min g <sup>-1</sup> )        |                        | (cm <sup>3</sup> g <sup>-1</sup> ) | (cm <sup>3</sup> g <sup>-1</sup> ) | (%)                                       |
| 5/5/90                                                           | 5                       | 13.3                          | 78.0                          | 64.7                   | 17.5                               | 19.4                               | 90.6                                      |
| 5/2/93                                                           | 5                       | 12.8                          | 109.3                         | 96.5                   | 25.3                               | 10.8                               | 84.7                                      |
| 9/1/90                                                           | 5                       | 14.1                          | 120.5                         | 106.4                  | 47.8                               | 6.0                                | 49.3                                      |
| 20/20/60                                                         | 8                       | 7.3                           | 18.8                          | 11.5                   | 26.6                               | 29.9                               | 89.8                                      |
| 25/10/65                                                         | 7                       | 7.5                           | 32.3                          | 24.8                   | 49.2                               | 22.3                               | 75.3                                      |
| 36/4/60                                                          | 8                       | 5.6                           | 40.7                          | 35.1                   | 109.6                              | 12.8                               | 51.0                                      |

**Table S8.** Breakthrough results of reported materials for C<sub>2</sub>H<sub>4</sub>/C<sub>3</sub>H<sub>6</sub> separation.

| Materials                 | Temperature<br>(K) | Flow rate<br>(mL min <sup>-1</sup> ) | Mixture composition and proportion<br>(v/v)                                                                                                                                                                 | C <sub>3</sub> H <sub>6</sub> /C <sub>2</sub> H <sub>4</sub> approximate<br>retention time difference<br>(min g <sup>-1</sup> ) |
|---------------------------|--------------------|--------------------------------------|-------------------------------------------------------------------------------------------------------------------------------------------------------------------------------------------------------------|---------------------------------------------------------------------------------------------------------------------------------|
| iso-MOF-4 <sup>[5]</sup>  | 298                | 2.67                                 | C <sub>2</sub> H <sub>4</sub> /C <sub>3</sub> H <sub>6</sub><br>50/50                                                                                                                                       | 95                                                                                                                              |
| spe-MOF <sup>[4]</sup>    | 298                | 2                                    | C <sub>2</sub> H <sub>4</sub> /C <sub>3</sub> H <sub>6</sub><br>50/50                                                                                                                                       | 67                                                                                                                              |
|                           |                    | 4                                    | C <sub>2</sub> H <sub>4</sub> /C <sub>3</sub> H <sub>6</sub><br>50/20                                                                                                                                       | 37                                                                                                                              |
|                           |                    | 5                                    | C <sub>2</sub> H <sub>4</sub> /C <sub>3</sub> H <sub>6</sub><br>90/10                                                                                                                                       | 36                                                                                                                              |
| <b>this work</b>          | 298                | 5                                    | C <sub>2</sub> H <sub>4</sub> /C <sub>3</sub> H <sub>6</sub> /Ar<br>5/5/90                                                                                                                                  | 65                                                                                                                              |
|                           |                    | 5                                    | C <sub>2</sub> H <sub>4</sub> /C <sub>3</sub> H <sub>6</sub> /Ar<br>5/2/93                                                                                                                                  | 97                                                                                                                              |
|                           |                    | 5                                    | C <sub>2</sub> H <sub>4</sub> /C <sub>3</sub> H <sub>6</sub> /Ar<br>9/1/90                                                                                                                                  | 106                                                                                                                             |
|                           |                    | 8                                    | C <sub>2</sub> H <sub>4</sub> /C <sub>3</sub> H <sub>6</sub> /Ar<br>20/20/60                                                                                                                                | 12                                                                                                                              |
|                           |                    | 7                                    | C <sub>2</sub> H <sub>4</sub> /C <sub>3</sub> H <sub>6</sub> /Ar<br>25/10/65                                                                                                                                | 25                                                                                                                              |
|                           |                    | 8                                    | C <sub>2</sub> H <sub>4</sub> /C <sub>3</sub> H <sub>6</sub> /Ar<br>36/4/60                                                                                                                                 | 35                                                                                                                              |
| UTSA-35a <sup>[14]</sup>  | 296                | /                                    | CH <sub>4</sub> /C <sub>2</sub> H <sub>2</sub> /C <sub>2</sub> H <sub>4</sub> /C <sub>2</sub> H <sub>6</sub> /C <sub>3</sub> H <sub>6</sub> /C <sub>3</sub> H <sub>8</sub><br>16.7/16.7/16.7/16.7/16.7/16.7 | 32                                                                                                                              |
| ANPC-2-700 <sup>[1]</sup> | 298                | /                                    | CH <sub>4</sub> /C <sub>2</sub> H <sub>4</sub> /C <sub>2</sub> H <sub>6</sub> /C <sub>3</sub> H <sub>6</sub> /C <sub>3</sub> H <sub>8</sub> /He<br>5/5/5/5/5/75                                             | 35.6                                                                                                                            |
| C-600 <sup>[15]</sup>     | 273                | /                                    | C <sub>2</sub> H <sub>4</sub> /C <sub>3</sub> H <sub>6</sub><br>50/50                                                                                                                                       | 4                                                                                                                               |
| ZU-16-Co <sup>[16]</sup>  | 298                | 2                                    | C <sub>2</sub> H <sub>2</sub> /C <sub>3</sub> H <sub>4</sub> /C <sub>2</sub> H <sub>4</sub> /C <sub>3</sub> H <sub>6</sub><br>0.5/0.5/49.5/49.5                                                             | 2                                                                                                                               |

|                           |     |   |                                                                                                                                                                                                     |    |
|---------------------------|-----|---|-----------------------------------------------------------------------------------------------------------------------------------------------------------------------------------------------------|----|
| CR-COF-2 <sup>[17]</sup>  | 298 | 1 | C <sub>2</sub> H <sub>4</sub> /C <sub>3</sub> H <sub>6</sub><br>50/50                                                                                                                               | 35 |
|                           |     | 2 | C <sub>2</sub> H <sub>4</sub> /C <sub>3</sub> H <sub>6</sub><br>50/20                                                                                                                               | 37 |
|                           |     | 4 | C <sub>2</sub> H <sub>4</sub> /C <sub>3</sub> H <sub>6</sub><br>90/10                                                                                                                               | 27 |
| HOF-FJU-1 <sup>[18]</sup> | 333 | 2 | CH <sub>4</sub> /C <sub>2</sub> H <sub>4</sub> /C <sub>2</sub> H <sub>6</sub> /C <sub>3</sub> H <sub>6</sub> /C <sub>3</sub> H <sub>8</sub> /CO <sub>2</sub> /H <sub>2</sub><br>31/10/25/10/10/1/13 | 80 |

## REFERENCES

- 1) P. Zhang, X. Wen, L. Wang, Y. Zhong, Y. Su, Y. Zhang, J. Wang, J. Yang, Z. Zeng and S. Deng. *Chem. Eur. J.*, 2020, **381**, 122731.
- 2) X. Liu, C. Hao, J. Li, Y. Wang, Y. Hou, X. Li, L. Zhao, H. Zhu and W. Guo. *Inorg. Chem. Front.*, 2018, **5**, 2898-2905.
- 3) S. Gao, C. G. Morris, Z. Lu, Y. Yan, H. G. W. Godfrey, C. Murray, C. C. Tang, K. M. Thomas, S. Yang and M. Schröder. *Chem. Mater.*, 2016, **28**, 2331-2340.
- 4) H. Fang, B. Zheng, Z.-H. Zhang, H.-X. Li, D.-X. Xue and J. Bai. *Angew. Chem. Int. Ed.*, 2021, **60**, 16521-16528.
- 5) W. Fan, X. Wang, X. Zhang, X. Liu, Y. Wang, Z. Kang, F. Dai, B. Xu, R. Wang and D. Sun. *ACS Central Sci.*, 2019, **5**, 1261-1268.
- 6) C. Chen, Z. Wei, Q. Qiu, Y. Fan, C. Cao, H. Wang, J. Jiang, D. Fenske and C. Su. *Cryst. Growth Des.*, 2017, **17**, 1476-1479.
- 7) W. Su, A. Zhang, Y. Sun, M. Ran and X. Wang. *J. Chem. Eng. Data.*, 2017, **62**, 417-421.
- 8) W. Fan, Y. Wang, Q. Zhang, A. Kirchon, Z. Xiao, L. Zhang, F. Dai, R. Wang and D. Sun. *Chem. Eur. J.*, 2018, **24**, 2137-2143.

- 9) W. Wei, X. Guo, Z. Zhang, Y. Zhang and D. Xue. *Inorg. Chem. Commun.*, 2021, **133**, 108896.
- 10) G. Chang, M. Huang, Y. Su, H. Xing, B. Su, Z. Zhang, Q. Yang, Y. Yang, Q. Ren, Z. Bao and B. Chen. *Chem. Commun.*, 2015, **51**, 2859-2862.
- 11) X. Wu, Z. Bao, B. Yuan, J. Wang, Y. Sun, H. Luo and S. Deng. *Micropor. Mesopor. Mat.*, 2013, **180**, 114-122.
- 12) D. Geng, M. Zhang, X. Hang, W. Xie, Y. Qin, Q. Li, Y. Bi and Z. Zheng. *Dalton Trans.*, 2018, **47**, 9008-9013.
- 13) Y. Zhang, X.-Q. Meng, H.-J. Ding, X. Wang, M.-H. Yu, S.-M. Zhang, Z. Chang and X.-H. Bu. *ACS Appl. Mater. Interfaces*, 2019, **11**, 20995-21003.
- 14) He, Z. Zhang, S. Xiang, F.R. Fronczek, R. Krishna and B. Chen. *Chem. Commun.*, 2012, **48**, 6493-6495.
- 15) H. Lyu, J. Zhu, B. Zhou, H. Cao, J. Duan, L. Chen, W. Jin and Q. Xu. *Carbon*, 2018, **139**, 740-749.
- 16) Z. Zhang, Q. Ding, J. Cui, X. Cui and H. Xing. *Small*, 2020, **16**, e2005360.
- 17) X. H. Han, K. Gong and X. Huang, J. Yang, X. Feng, J. Xie and B. Wang. *Angew. Chem. Int. Ed.*, 2022, **61**, e202202912.
- 18) Y. Chen, Y. Yang, Y. Wang, Q. Xiong, J. Yang, S. Xiang, L. Li, J. Li, Z. Zhang and B. Chen. *J Am. Chem. Soc.*, 2022, **144**, 17033-17040.
